# Supplementary material for: Architecting carbon-coated Mo2CTx/MoSe2 heterostructures enables robust potassium storage
Source: Royal Society of Chemistry journal article supplement (doi:10.1039/d3cc03479h), 2023-01-01

## Supporting Information for:

# Architecting carbon coated $\text{Mo}_2\text{CT}_x/\text{MoSe}_2$ heterostructures enable robust potassium storage

Qingqing Jiang,<sup>\*a, #</sup> Weifang Zhao,<sup>a, #</sup> Xinyue Xu,<sup>a</sup> Da Ke,<sup>b</sup> Ran Ren,<sup>a</sup> Fuzhen Zhao,<sup>a</sup> Shilin Zhang,<sup>c</sup> Tengfei Zhou,<sup>\*b</sup> Juncheng Hu<sup>\*a</sup>

<sup>a</sup> Key Laboratory of Catalysis and Energy Materials Chemistry of Ministry of Education, Hubei Engineering Technology Research Centre of Energy Polymer Materials, School of Chemistry and Materials Science, South-Central Minzu University, Wuhan 430074, China

<sup>b</sup> Institutes of Physical Science and Information Technology, Anhui University, Hefei 230601, China

<sup>c</sup> School of Chemical Engineering & Advanced Materials, University of Adelaide, Adelaide, SA 5005, Australia

## 1. Experimental Methods

**1.1. Preparation of  $\text{Mo}_2\text{CT}_x$  MXene flakes:**  $\text{Mo}_2\text{CT}_x$  flakes were prepared by Ga etching from  $\text{Mo}_2\text{Ga}_2\text{C}$  powder in aqueous HF. Specifically, 500 mg  $\text{Mo}_2\text{Ga}_2\text{C}$  powder was slowly added into 40 mL HF (49 wt.%) and kept stirring at 58 °C for 7 days. Afterwards, the precipitate was collected by centrifugation and washed several times with deionized water (until pH  $\approx$  6). Finally, the product was dried in a vacuum freeze dryer for 48 h to obtain  $\text{Mo}_2\text{CT}_x$  powder.

**1.2. Preparation of  $\text{MoSe}_2/\text{Mo}_2\text{CT}_x$  heterostructures:** Firstly,  $\text{Mo}_2\text{CT}_x$  powder was dispersed in deionized water and ultrasonic treatment for 3 h under flowing  $\text{N}_2$  atmosphere to obtain  $\text{Mo}_2\text{CT}_x$  suspension (1 mg/mL). Subsequently, 40 mg of Se powder was dissolved in 5 mL of  $\text{N}_2\text{H}_4 \cdot \text{H}_2\text{O}$  (85 wt.%) by continuously stirring for 1 h. Meanwhile, 61 mg of  $\text{Na}_2\text{MoO}_4 \cdot 2\text{H}_2\text{O}$  was dissolved in 20 mL of deionized water to obtain a clarified solution. Then, 15 mL of  $\text{Mo}_2\text{CT}_x$  suspension (1 mg/mL) was added into the  $\text{Na}_2\text{MoO}_4$  solution under stirring and ultrasonic treatment for 1 h. Afterward, the Se- $\text{N}_2\text{H}_4$  solution was added dropwise to the above mixture. The resulting suspension was transferred into a Teflon-lined stainless-steel autoclave and heated at 200 °C for 12 hours. After cooling to room temperature, the product was collected by centrifugation and washed with deionized water for several times. Finally,  $\text{MoSe}_2/\text{Mo}_2\text{CT}_x$  powder was obtained by drying overnight at 60 °C in a vacuum oven. In addition, other samples with different mass ratio

(MoSe<sub>2</sub> to Mo<sub>2</sub>CT<sub>x</sub>) were prepared, including 1/2-MoSe<sub>2</sub>/Mo<sub>2</sub>CT<sub>x</sub>-5 (20 mg Se powder, 30 mg Na<sub>2</sub>MoO<sub>4</sub>·2H<sub>2</sub>O and 5 ml Mo<sub>2</sub>CT<sub>x</sub> suspension), 2-MoSe<sub>2</sub>/Mo<sub>2</sub>CT<sub>x</sub>-5 (79 mg Se powder, 121 mg Na<sub>2</sub>MoO<sub>4</sub>·2H<sub>2</sub>O and 5 ml Mo<sub>2</sub>CT<sub>x</sub> suspension), MoSe<sub>2</sub>/Mo<sub>2</sub>CT<sub>x</sub>-5 (5 ml Mo<sub>2</sub>CT<sub>x</sub> suspension) and MoSe<sub>2</sub>/Mo<sub>2</sub>CT<sub>x</sub>-10 (10 ml Mo<sub>2</sub>CT<sub>x</sub> suspension).

**1.3. Preparation of MoSe<sub>2</sub>/Mo<sub>2</sub>CT<sub>x</sub>@C:** 45 mg of MoSe<sub>2</sub>/Mo<sub>2</sub>CT<sub>x</sub> powder was dispersed in 80 mL of Tris-buffer solution (10 mM) by ultrasonic treatment for 1 h. Next, 25 mg of dopamine hydrochloride was quickly added to the mixed solution. After continuous stirring for 3 h, the black precipitate was collected by centrifugation and washed with deionized water. Subsequently, MoSe<sub>2</sub>/Mo<sub>2</sub>CT<sub>x</sub>@PDA was obtained by vacuum drying overnight at 60 °C. Finally, the MoSe<sub>2</sub>/Mo<sub>2</sub>CT<sub>x</sub>@PDA were placed in a tube furnace and heated at 600 °C for 2 h to obtain MoSe<sub>2</sub>/Mo<sub>2</sub>CT<sub>x</sub>@C.

**1.4. Preparation of Mo<sub>2</sub>CT<sub>x</sub>/Se:** The Se powder and Mo<sub>2</sub>CT<sub>x</sub> powder were placed at the upstream and downstream of the tube furnace in two separate ceramic boats, respectively. The weight ratio of sample to selenium powder was 1:1.5. Then, the temperature was elevated to 600 °C with a heating rate of 5 °C min<sup>-1</sup> and the reaction was kept at 600 °C for 2 h to obtain Mo<sub>2</sub>CT<sub>x</sub>/Se samples.

### 1.5 Materials Characterization

Scanning electron microscopy (SEM) was performed with a field-emission scanning electron microscope (Hitachi SU-8010, Japan) operated at a deceleration voltage of 1.5 kV to characterize the morphologies of the products. Transmission electron microscopy (TEM) images were taken with a JEOL JEM-2010 LaB6 high-resolution transmission electron microscope operated at 200 kV. High-resolution (HRTEM) images were taken with a JEOL JEM-2100F field-emission high-resolution transmission electron microscope operated at 200 kV. X-ray diffraction (XRD) patterns were recorded with a D8 Advance X-ray diffractometer (Bruker AXS company, Germany) equipped with a Cu-K $\alpha$  radiation source ( $\lambda=1.5406$  Å). A DXR Raman confocal microscope (Thermo Fisher Scientific, USA) with a 532 nm @10 mW Laser was used to record Raman spectra. X-ray photoelectron spectroscopy (XPS) measurements (VG Multilab 2000 photoelectron spectrometer) was performed with a Al K $\alpha$  radiation as the excitation source under a  $2\times 10^{-6}$  Pa vacuum; the C 1s peak of the surface adventitious carbon at 284.6 eV was used to calibrate all of the binding energies.

### 1.6 Preparation of Electrolyte

The electrolyte system including 3M KFSI (DME) and 3M KFSI (EC/DEC) were prepared by dissolving a certain amount of potassium salt (KFSI) into different solvents, including carbonate-based solvents (EC+DEC, 1 : 1 volume ratio), and ether-based solvents (DME) in an argon-filled glove box (O<sub>2</sub> < 0.1 ppm, H<sub>2</sub>O < 0.1 ppm).

## 1.7 Electrochemical Characterization

The electrochemical tests were carried out using CR2032 coin-type cells. The working electrodes were prepared by mixing the active materials, Ketjen black, and polyvinylidene fluoride (PVDF), at a weight ratio of 70 : 20 : 10, which was then pasted on a copper foil. For half PIBs, K metal was used as the counter and reference electrode, and a polypropylene membrane (Celgard 2400) was used as the separator. Cell assembly was performed in an argon-filled glovebox. The mass loading of active material in the working electrode was about 0.8-1.0 mg cm<sup>-2</sup>, and the diameter of the working electrode was 8 mm. The amount of electrolyte for each coin battery is around 240 μL. The charge and discharge tests were conducted with a NEWARE battery tester. Cyclic voltammograms (CVs) in a voltage range of 0.01-3 V and electrochemical impedance spectroscopy (EIS) spectrum were performed with an electrochemical workstation (IviumStath., Ivium Holland, Inc.). Electrochemical impedance spectra were obtained in the frequency range of 100 kHz-0.01 Hz with an amplitude of 5 mV. Galvanostatic intermittent titration technique (GITT) tests were recorded with a NEWARE battery tester in the potential range of 0.01-3 V at ambient temperature. After charge-discharge for 20 cycles, GITT measurements were carried out at a low current density of 50 mA g<sup>-1</sup> for 0.5 h followed by a rest interval of 2 h.

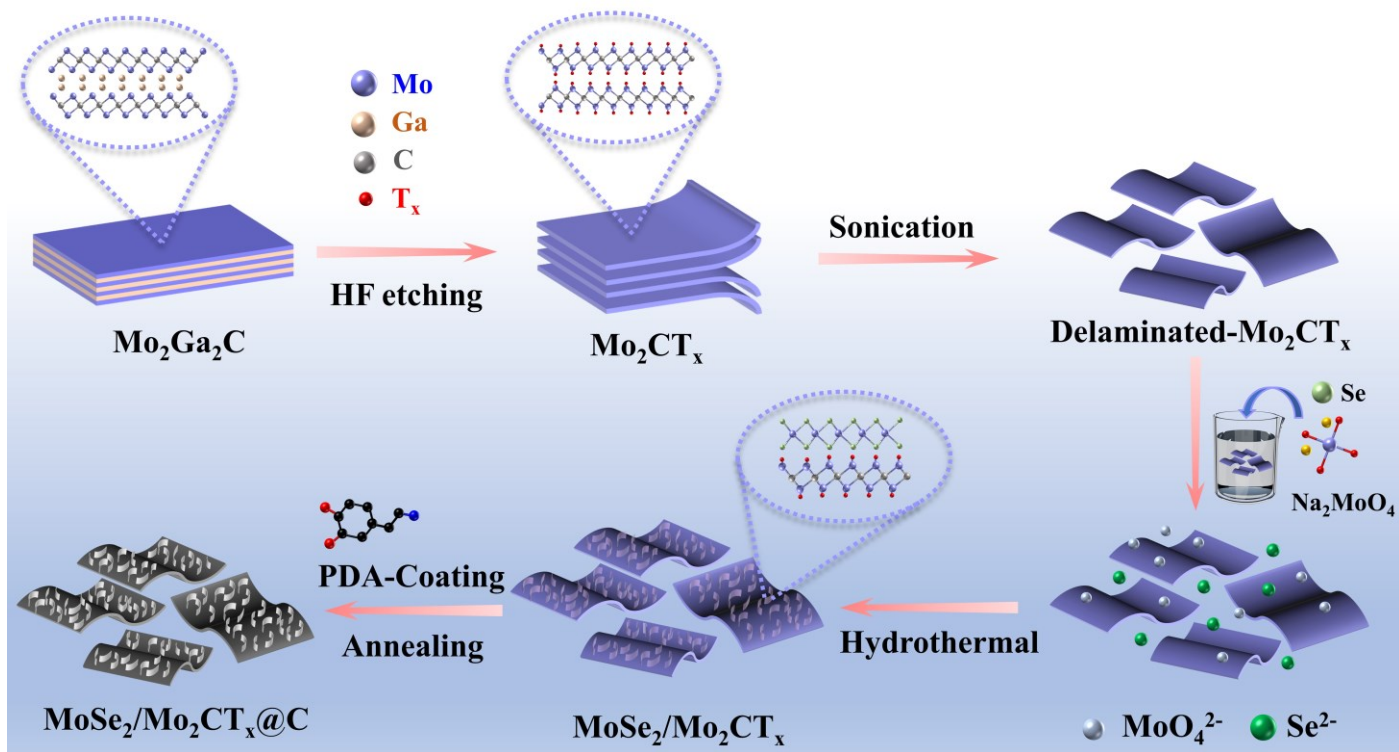

**Fig. S1** Detailed schematic of the synthesis procedures of  $\text{MoSe}_2/\text{Mo}_2\text{CT}_x@C$ .

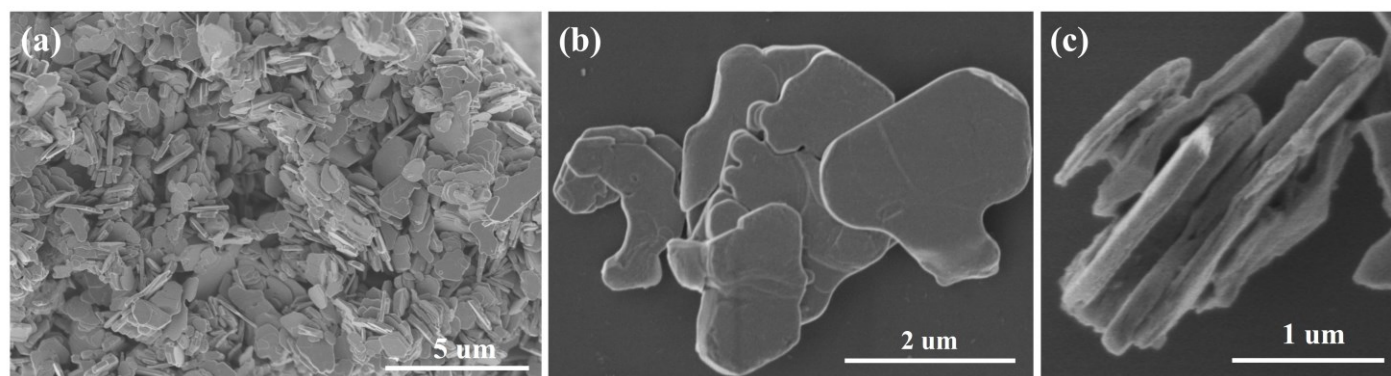

**Fig. S2** SEM images of  $\text{Mo}_2\text{CT}_x$  MXenes.

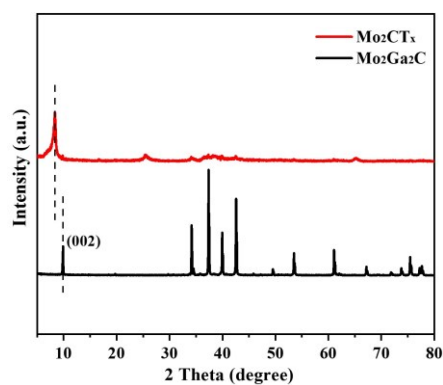

**Fig. S3** XRD patterns of  $\text{Mo}_2\text{Ga}_2\text{C}$  MAX and  $\text{Mo}_2\text{CT}_x$  MXenes.

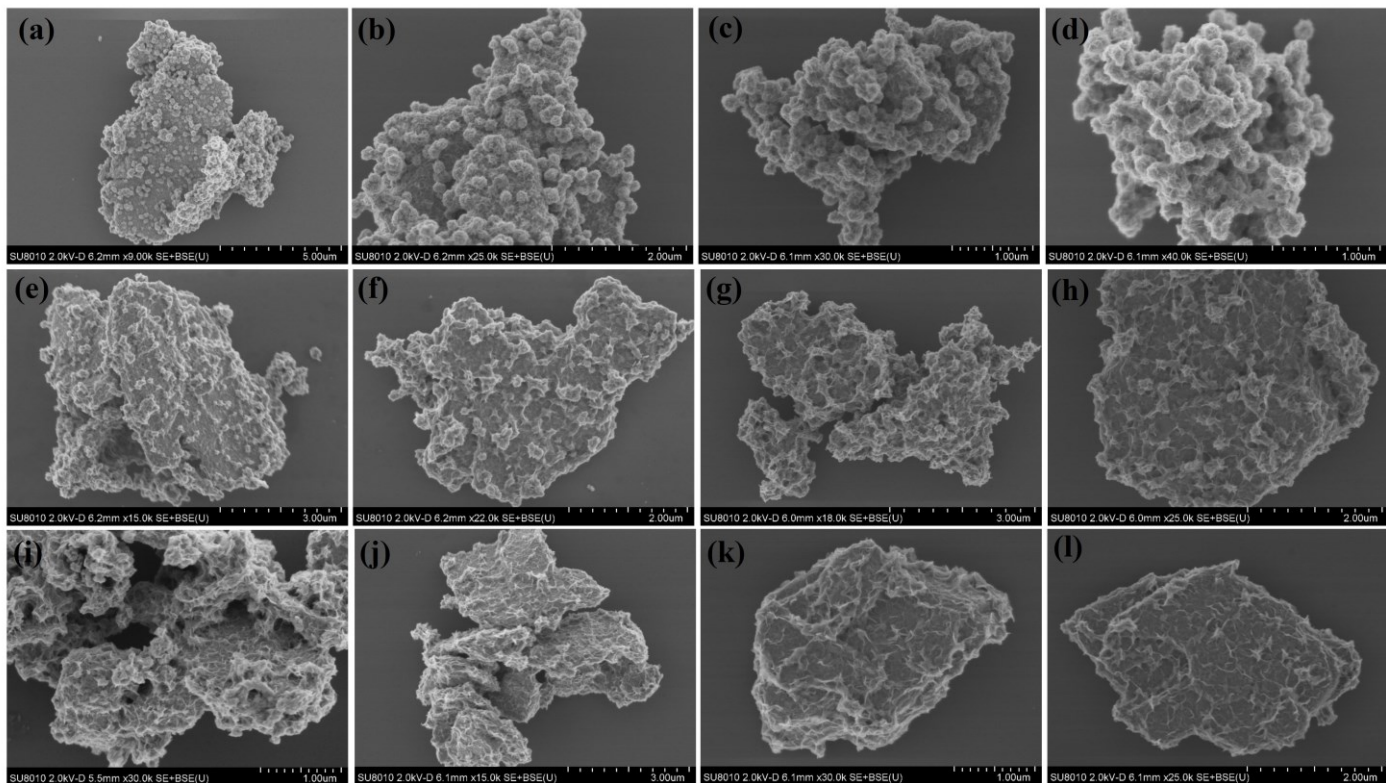

**Fig. S4** SEM images of (a-d)  $\text{MoSe}_2/\text{Mo}_2\text{CT}_x-5$ , (e-h)  $\text{MoSe}_2/\text{Mo}_2\text{CT}_x-10$ , (i-l)  $\text{MoSe}_2/\text{Mo}_2\text{CT}_x-15$ .

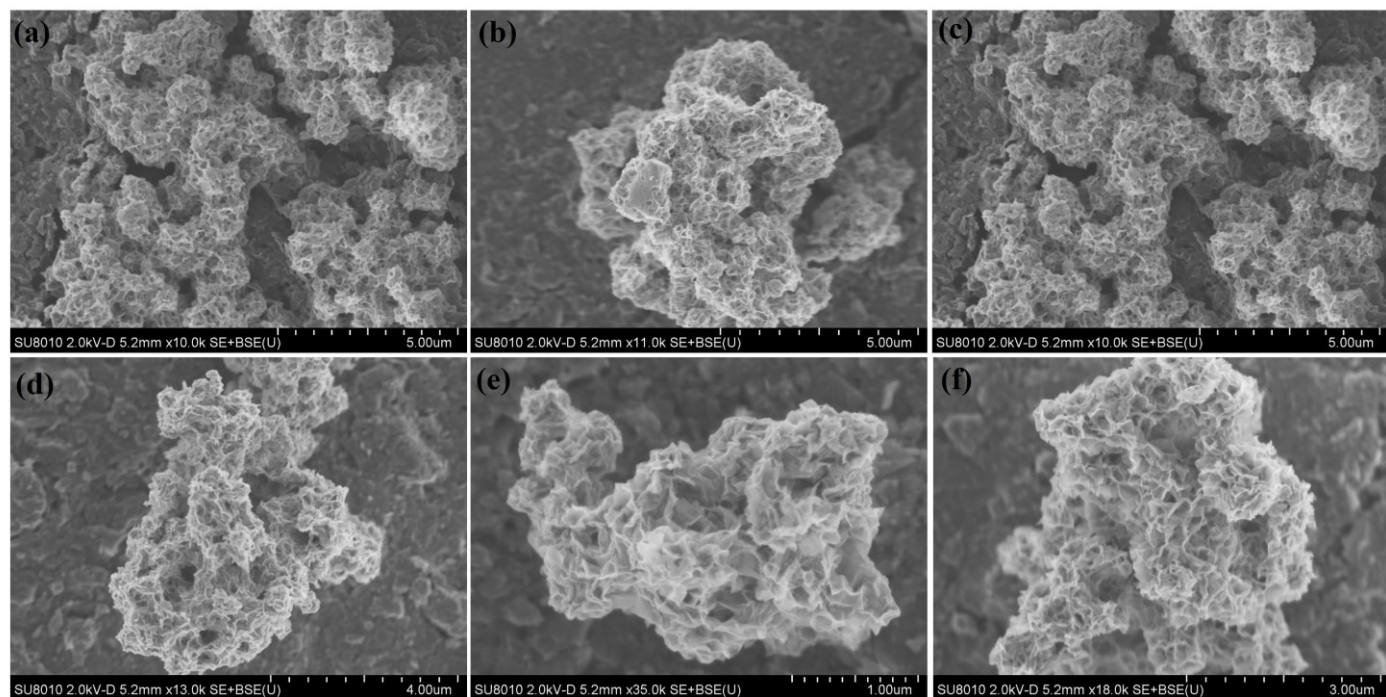

**Fig. S5** SEM images of (a-c)  $1/2\text{-MoSe}_2/\text{Mo}_2\text{CT}_x-5$ , (d-f)  $2\text{-MoSe}_2/\text{Mo}_2\text{CT}_x-5$ .



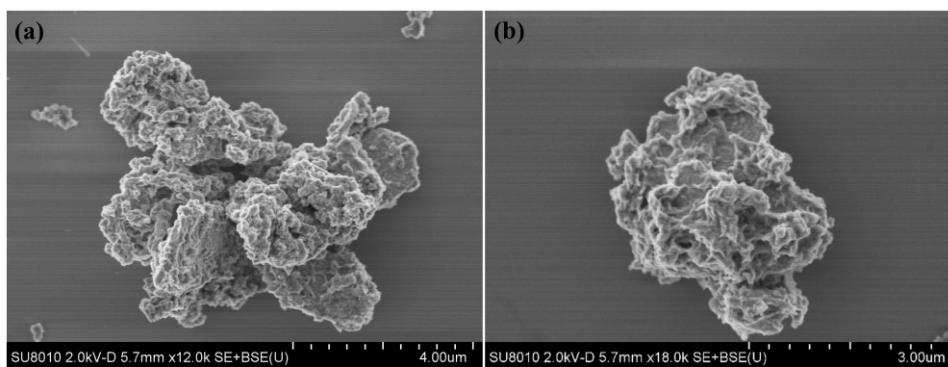

**Fig. S6** SEM images of  $\text{MoSe}_2/\text{Mo}_2\text{CT}_x@\text{C}$ .

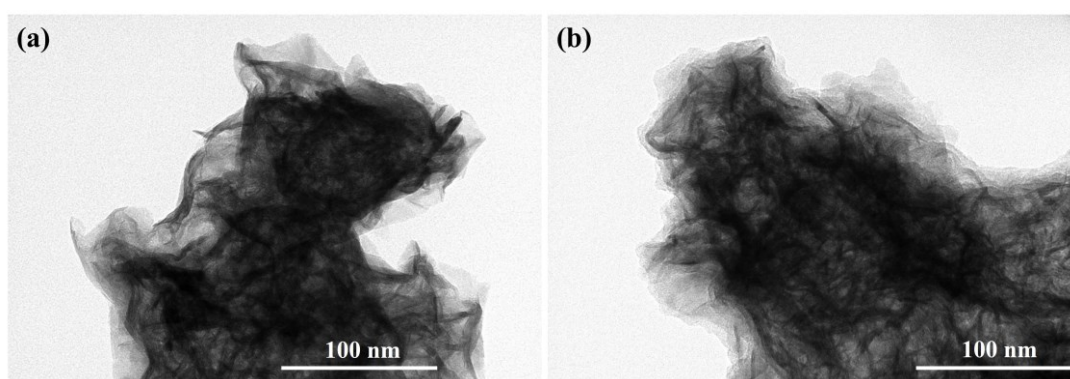

**Fig. S7** TEM images of (a)  $\text{MoSe}_2/\text{Mo}_2\text{CT}_x$ , (b)  $\text{MoSe}_2/\text{Mo}_2\text{CT}_x@\text{C}$ .

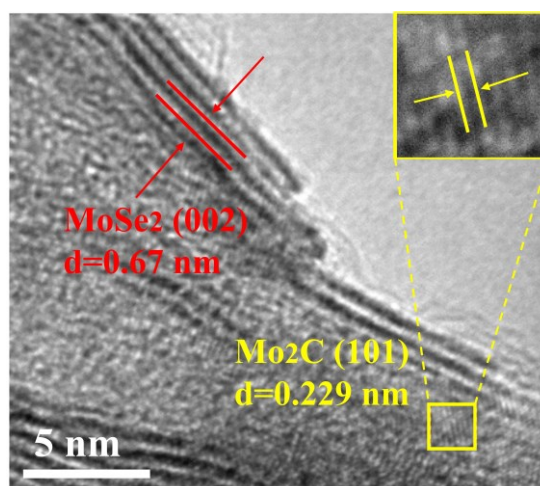

**Fig. S8** HRTEM images of  $\text{MoSe}_2/\text{Mo}_2\text{CT}_x@\text{C}$ .

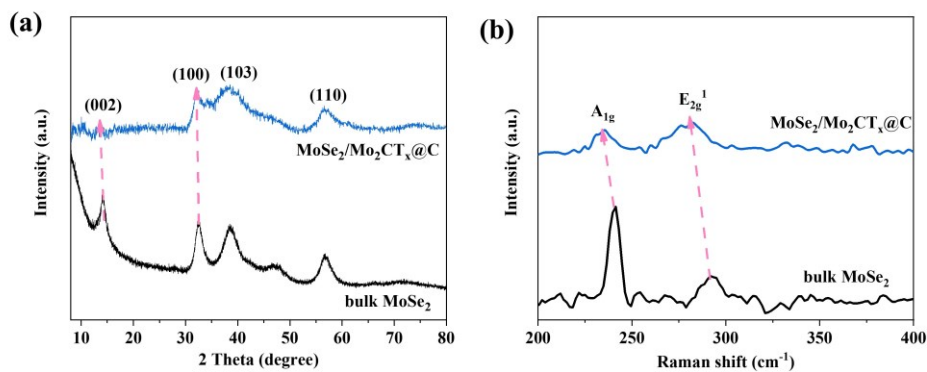

Fig. S9 (a) XRD pattern and (b) Raman spectrum of bulk MoSe<sub>2</sub> and MoSe<sub>2</sub>/Mo<sub>2</sub>CT<sub>x</sub>@C.

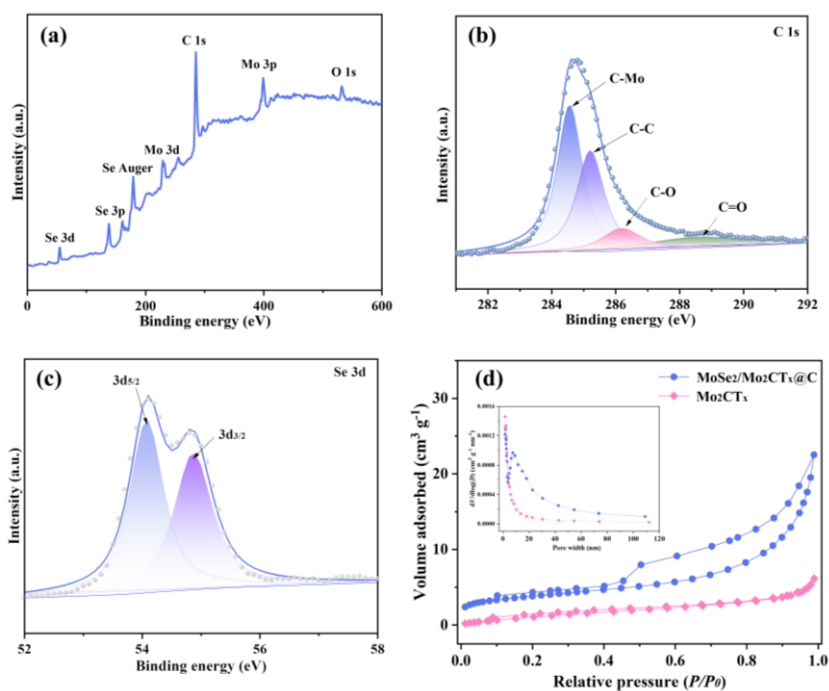

Fig. S10 (a) XPS survey of MoSe<sub>2</sub>/Mo<sub>2</sub>CT<sub>x</sub>@C. XPS spectrum of (b) C 1s, (c) Se 3d in MoSe<sub>2</sub>/Mo<sub>2</sub>CT<sub>x</sub>@C. (d) N<sub>2</sub> adsorption and desorption isotherm and pore-size distribution of pure Mo<sub>2</sub>CT<sub>x</sub> and MoSe<sub>2</sub>/Mo<sub>2</sub>CT<sub>x</sub>@C.

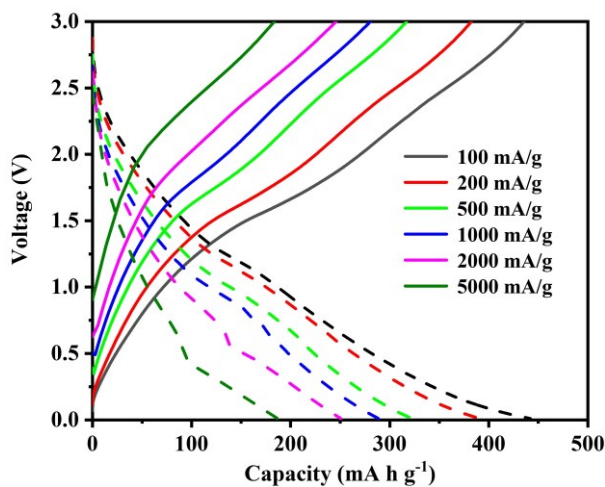

Fig. S11 GDV curves of MoSe<sub>2</sub>/Mo<sub>2</sub>CT<sub>x</sub>@C electrode at different current density.

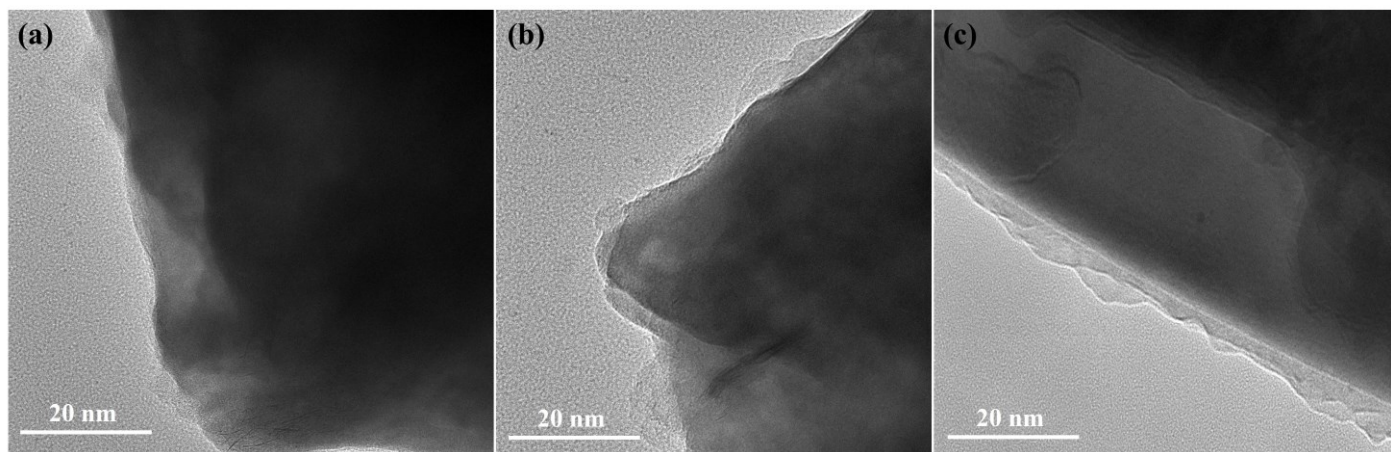

**Fig. S12** SEI films for (a)  $\text{MoSe}_2/\text{Mo}_2\text{CT}_x$  electrode and (b-c)  $\text{MoSe}_2/\text{Mo}_2\text{CT}_x@\text{C}$  electrode.

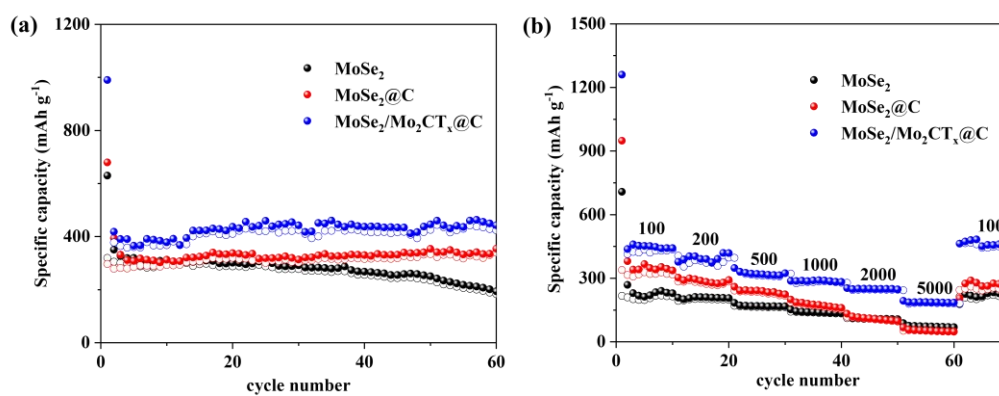

**Fig. S13** The (a) cycling performance at  $100 \text{ mA g}^{-1}$  and (b) rate performance at  $100 \text{ mA g}^{-1}$ ,  $200 \text{ mA g}^{-1}$ ,  $500 \text{ mA g}^{-1}$ ,  $1000 \text{ mA g}^{-1}$ ,  $2000 \text{ mA g}^{-1}$  and  $5000 \text{ mA g}^{-1}$  of  $\text{MoSe}_2$ ,  $\text{MoSe}_2@\text{C}$  and  $\text{MoSe}_2/\text{Mo}_2\text{CT}_x@\text{C}$ .

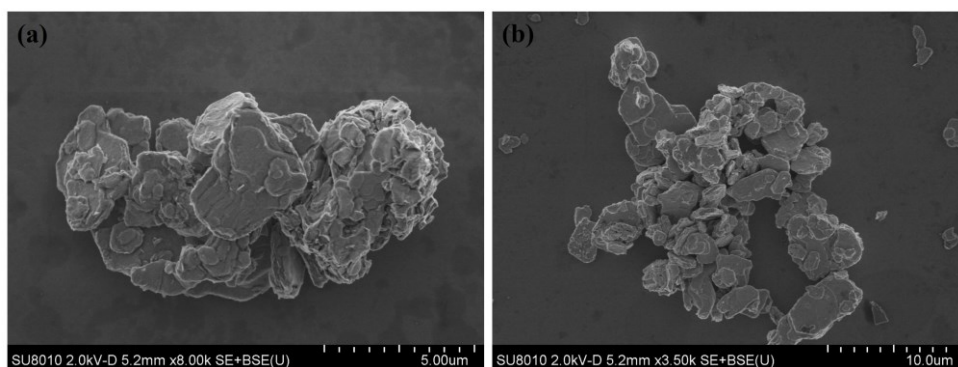

**Fig. S14** SEM images of  $\text{Mo}_2\text{CT}_x/\text{Se}$  nanohybrids.



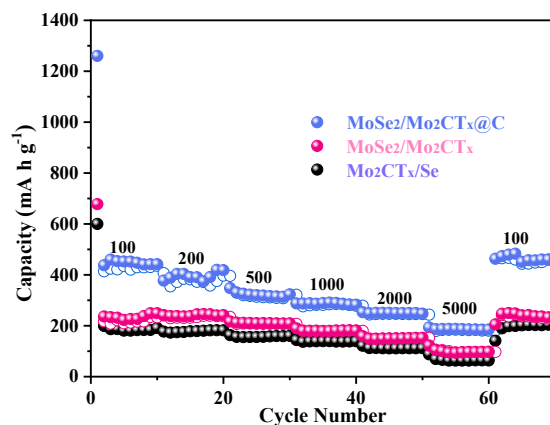

Fig. S15 Comparison of rate performance for  $\text{Mo}_2\text{CT}_x/\text{Se}$ ,  $\text{MoSe}_2/\text{Mo}_2\text{CT}_x$  and  $\text{MoSe}_2/\text{Mo}_2\text{CT}_x@\text{C}$ .

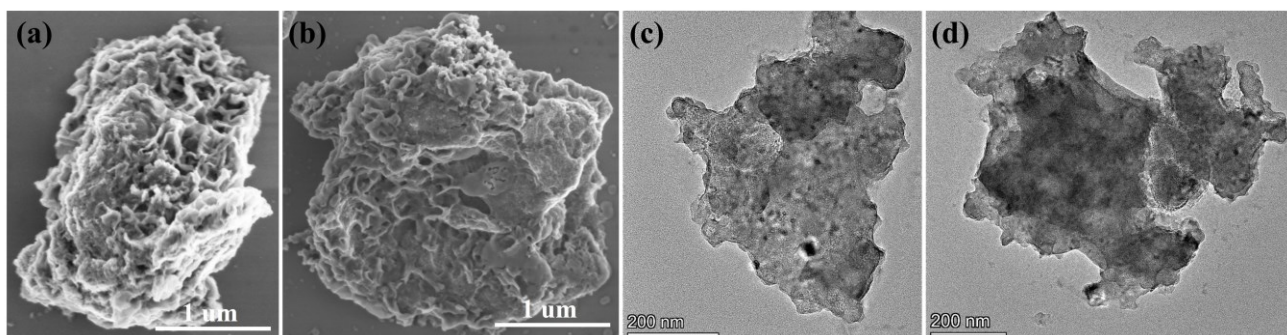

Fig. S16 Ex-situ (a-b) SEM and (c-d) TEM of  $\text{MoSe}_2/\text{Mo}_2\text{CT}_x@\text{C}$  electrode after 500 cycles at  $2000 \text{ mA g}^{-1}$ .

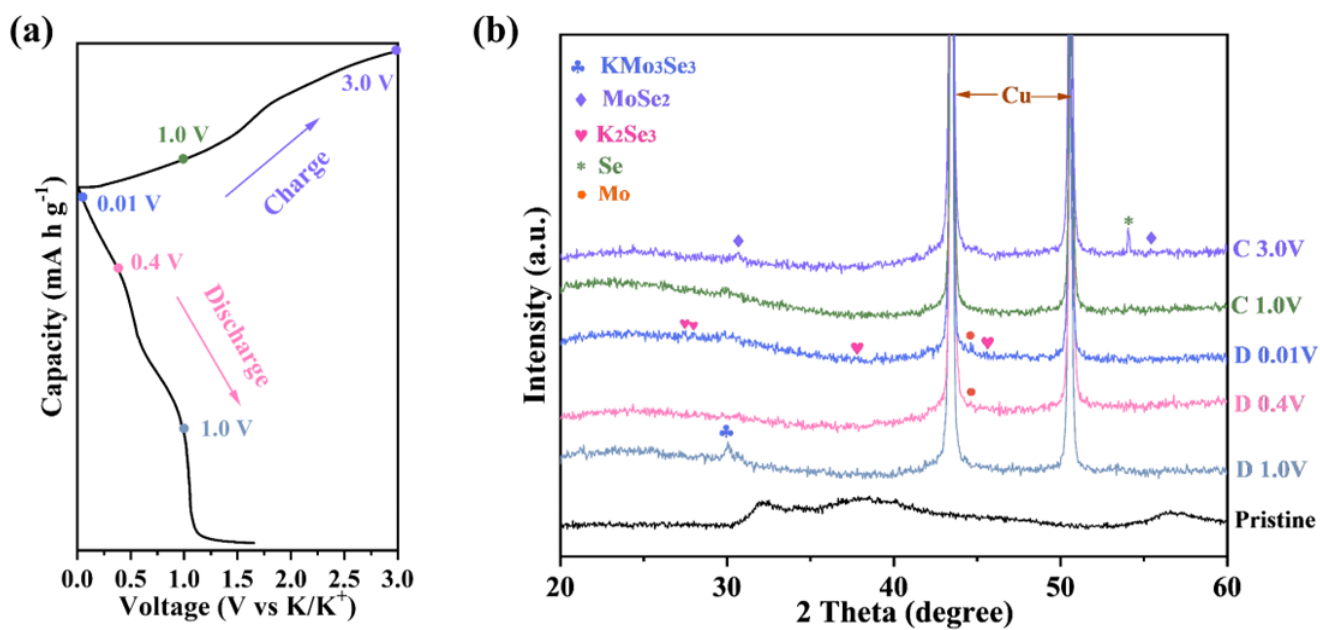

Fig. S17 (a) Illustration of the charge and discharge states. (b) Ex situ XRD patterns at various charge and discharge states.

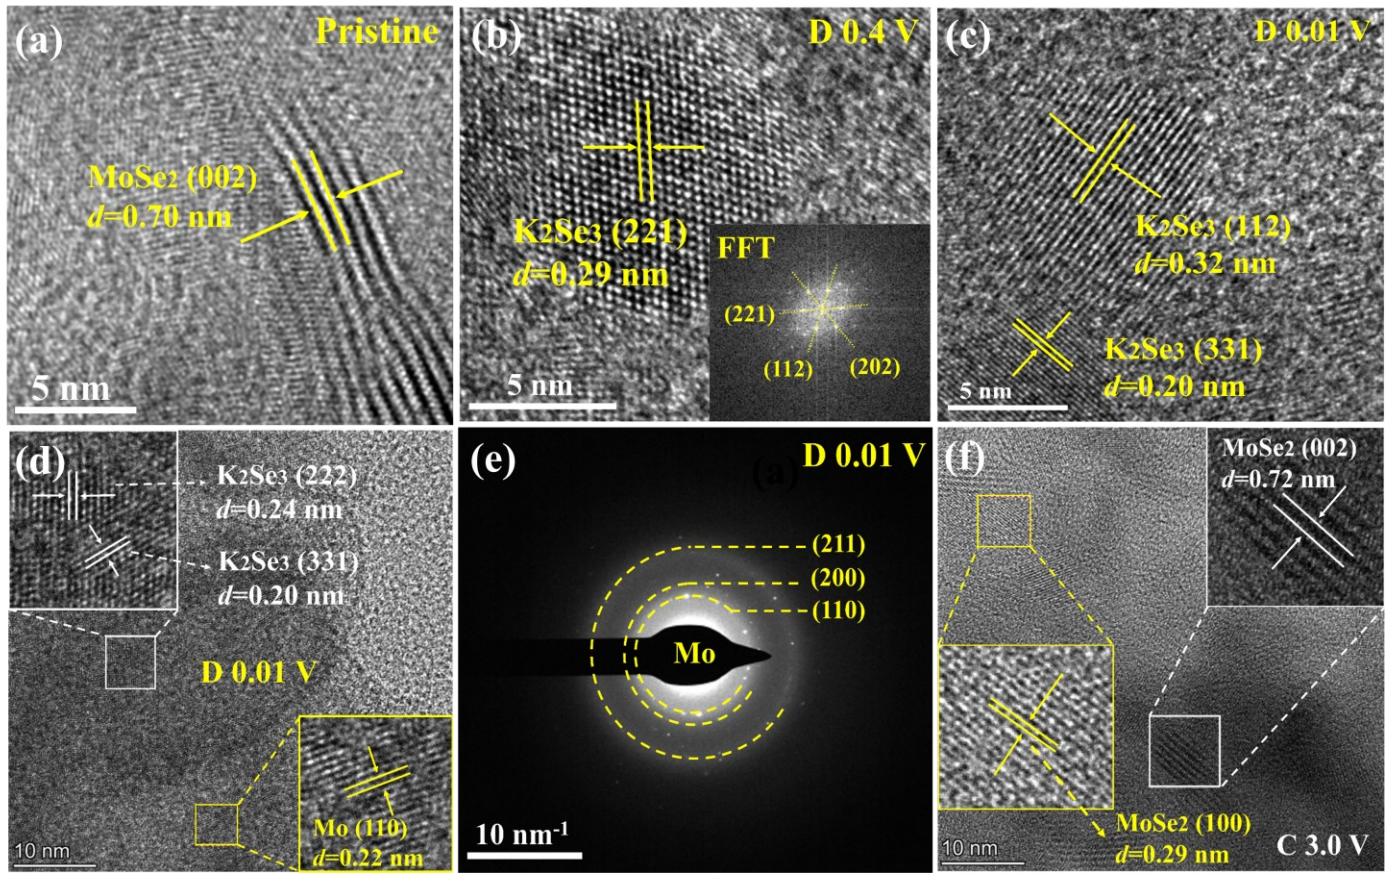

**Fig. S18** (a-f) Ex-situ HRTEM images of MoSe<sub>2</sub>/Mo<sub>2</sub>CT<sub>x</sub>@C electrode at various charge and discharge stages.

The conversion reaction mechanism of MoSe<sub>2</sub>/Mo<sub>2</sub>CT<sub>x</sub>@C in PIBs could be derived as following based on the above-mentioned analysis:

Discharging:

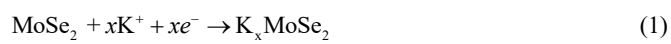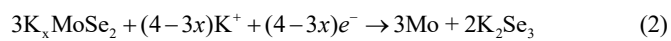

Charging:

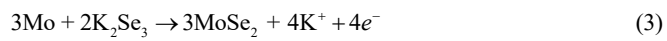

Supplement: d3cc03479h1.pdf [file d3cc03479h1.pdf]
